1 What contraceptive side effects are women told about during counseling? Evidence from PMA Ethiopia  
2 2019 cross-sectional survey

3

4 Short Title: Contraceptive counseling on side effects

5

6 Linnea A. Zimmerman<sup>1</sup>, Isabella Sarria<sup>1</sup>, Munir Kassa<sup>2</sup>, Celia Karp<sup>1</sup>, Assefa Seme<sup>3</sup>, Solomon Shiferaw<sup>3</sup>

7

8 1. Department of Population, Family, and Reproductive Health, Johns Hopkins Bloomberg School  
9 of Public Health, Baltimore MD, USA

10 2. Federal Ministry of Health, Ethiopia, Addis Ababa, Ethiopia

11 3. School of Public Health, Addis Ababa University, Addis Ababa, Ethiopia

12

13 Corresponding author:

14 Linnea A. Zimmerman

15 Johns Hopkins Bloomberg School of Public Health

16 Department of Population, Family and Reproductive Health

17 615 N Wolfe St E4531Batlimore, MD 21231

18 [linnea.zimmerman@jhu.edu](mailto:linnea.zimmerman@jhu.edu)

19 +1 360 300 7301

20

21  
22  
23  
24  
25  
26  
27  
28  
29  
30  
31  
32  
33  
34  
35  
36  
37  
38  
39  
40  
41  
42  
43  
44  
45  
46

**Abstract**

**Background** Despite widespread concerns about contraceptive side effects, few studies explore the specific side effects women are told about during contraceptive counseling. This study explored patterns of counseling on specific side effects by user characteristics in Ethiopia.

**Methods** Data were collected from a nationally representative sample of women between October and December 2019. Analyses were restricted to 2,039 current users of hormonal contraception or the non-hormonal IUD. Descriptive analyses identified the types and number of side effects, across all methods and by the injectable, implant, and pill. Multinomial regression identified factors associated with receipt of counseling on bleeding changes only, non-bleeding changes only, or both, relative to no counseling on side effects, adjusting for method type, source, and socio-economic characteristics.

**Results** Less than 10% of users were told of at least one bleeding and non-bleeding side effect. Relative to implant users, injectable and other method users were less likely to be told about bleeding changes only (aRRR: 0.65, 95% CI: 0.46-0.93 and aRRR: 0.31, 95% CI: 0.16-0.61, respectively) and users of other methods were less likely to be told about both a bleeding and non-bleeding change (aRRR: 0.43, 95% CI: 0.19-0.93). Users who received their method from a non-public source were less likely to receive counseling on any kind of side effect and nulliparous women were less likely to be told about both kinds of side effects.

**Conclusion** There is need to improve counseling in the private sector. Research to understand provider barriers to counseling on side effects is needed.

## 47 **Background**

48

49 The provision of unbiased, scientifically accurate information supports the rights of women to make  
50 informed decisions about their reproductive health, including their choice of contraceptive method <sup>1,2</sup>.

51 Counseling on potential side effects, particularly for hormonal contraceptive methods and the copper  
52 IUD, which can induce a range of documented side effects <sup>3</sup>, is a critical component of counseling. Fear  
53 of side effects or health concerns is among the most common reasons provided for not using a method,  
54 despite wanting to delay or prevent pregnancy <sup>4-6</sup>, and the most common reason given for contraceptive  
55 discontinuation among women at risk of unintended pregnancy <sup>7-9</sup>. Counseling that includes information  
56 on potential side effects is effective in increasing the likelihood of method adoption and continuation and  
57 in decreasing discontinuation rates <sup>10-12</sup>. Conversely, the provision of inaccurate, incomplete, or biased  
58 information can increase dissatisfaction and discontinuation <sup>13</sup>, and most importantly, is a violation of  
59 women's right to accurate information, limiting their reproductive autonomy <sup>2,14</sup>.

60

61 Recognizing the importance of informing women about potential side effects, recent measurement efforts  
62 have prioritized assessing counseling on side effects. Specifically, items measuring the receipt of this  
63 information were included in the Method Information Index (MII), a three-question measure evaluating  
64 whether a woman was told about 1) methods other than the method she chose, 2) side effects, and 3) what  
65 to do if she experienced side effects <sup>15</sup>. Higher scores on the MII have been shown to be associated with  
66 contraceptive behavior; women who reported being informed about all aspects of the MII were 80% less  
67 likely to discontinue, while those informed about any one aspect of the MII were 68% less likely to  
68 discontinue contraceptive use <sup>16</sup>. Given its ease in measurement and interpretation, in addition to its  
69 association with key contraceptive behaviors <sup>17</sup>, the MII has been widely used as a proxy to monitor,  
70 evaluate, and improve the quality of contraceptive services <sup>18-21</sup>.

71

72 Despite the utility of the MII, however, evidence gaps remain related to the content and  
73 comprehensiveness of counseling on side effects. Identifying the side effects on which women are  
74 counseled has important implications for program design and intervention. Chang and colleagues asked  
75 women in Pakistan and Uganda to report specific side effects on which they were counseled and adjusted  
76 the MII to reflect whether these side effects were consistent with their chosen method. When adjusted for  
77 method-specific consistency, MII estimates were up to 50% lower in Pakistan and 30% lower in Uganda,  
78 indicating that women were frequently counseled on side effects that were not associated with their  
79 chosen method<sup>22</sup>, an important programmatic finding. Similarly, while women frequently report  
80 contraceptive-induced menstrual bleeding changes as a major concern<sup>23</sup>, recent population-based surveys  
81 have identified a wide-range of side effects, including some such as headaches and nausea, that are  
82 reported as, or more, frequently than bleeding changes among hormonal contraceptive and copper IUD  
83 users<sup>24,25</sup>. Women also frequently report concerns of side effects that are not clinically documented,  
84 particularly fears of contraceptive-induced infertility or sub-fecundity<sup>26–29</sup>, which frequently arises in  
85 qualitative research as a primary reason to not use hormonal contraceptive methods<sup>26,27,30,31</sup>.

86 Understanding the specific side effects on which women are counseled, whether clinically validated or  
87 not, is thus critical to design counseling tools and training programs that align with side effects women  
88 are likely to experience and/or that are of particular concern, such as infertility.

89

90 Such efforts can be further improved by identifying whether the comprehensiveness of side effect  
91 counseling varies across women. Recent evidence suggests that women who use long-acting methods are  
92 more likely to receive all components of the MII<sup>19,20</sup>, indicating that method choice may influence the  
93 comprehensiveness of counseling services (or vice versa). Similarly, evidence across 25 countries found  
94 that the MII was generally positively associated with wealth and education and was higher in urban  
95 relative to rural areas and among women who received services from public, relative to private, providers  
96<sup>20</sup>. Additionally, provider-held concerns about contraceptive-induced infertility and other safety concerns  
97 may influence counseling for young, unmarried, and nulliparous women<sup>32–34</sup>. Evidence thus suggests that

98 women of more privileged backgrounds and those who are older and parous may be more likely to  
99 receive comprehensive information on side effects, but this has not been documented.

100  
101 The purpose of this study is thus to explore patterns of specific side effects on which hormonal  
102 contraceptive or copper IUD users are counseled, using nationally representative cross-sectional data  
103 from Ethiopia. Our objectives are first to describe overall levels of counseling on specific side effects and  
104 then to explore patterns in receipt of counseling by user characteristics; specifically, we examine whether  
105 receipt of counseling on bleeding changes, non-bleeding changes, or receipt of both varies by  
106 sociodemographic characteristics, accounting for method type and source.

107

## 108 **Methods**

### 109 *Study Setting*

110 Ethiopia is a low-income country in sub-Saharan Africa. Modern contraceptive use has increased  
111 significantly, from approximately 8% of married women in 2000<sup>35</sup> to 35.8% in 2019<sup>36</sup>. The method mix  
112 is largely dominated by the injectable (55% of modern contraception users), but use of the contraceptive  
113 implant has grown in recent years, from 16% of the method mix in 2014 to 32% in 2019<sup>36</sup>. Despite  
114 increases in use, recent evidence from Ejigu and colleagues found that quality of counseling services has  
115 declined recently, from 39% of modern contraceptive users receiving all three components of the MII in  
116 2015 to 12% in 2019<sup>21</sup>. Concerns regarding side effects are consistently reported as a main contributor to  
117 discontinuation<sup>37-39</sup>, and discontinuation rates within one year remain high, exceeding 40%<sup>37</sup>.

118

### 119 *Data Source*

120 Data came from the PMA Ethiopia 2019 nationally-representative, cross-sectional household survey of  
121 women ages 15-49. PMA Ethiopia is a survey platform implemented in collaboration between Addis  
122 Ababa University, the Federal Ministry of Health of Ethiopia, and Johns Hopkins University. Multistage  
123 sampling using probability proportional to size within region and urban/rural strata was used to select 265

124 enumeration areas (EAs). Between October and December 2019, all households within each EA were  
125 listed and 35 households were randomly selected. All women aged 15-49 who were either usual members  
126 of the household or who slept in the household the night before were eligible for the cross-sectional  
127 survey. After being informed of study procedures, women provided verbal consent and were interviewed  
128 by a previously trained female interviewer. A total of 8,837 women were interviewed. More information  
129 about the study and design are available from the study protocol <sup>40</sup>. PMA Ethiopia received ethical  
130 approval from Addis Ababa University, College of Health Sciences (Ref: AAUMF 01–008) and the Johns  
131 Hopkins University Bloomberg School of Public Health Institutional Review Board (FWA00000287).  
132 Personally identifiable information collected during data collection were available to the data  
133 management team and PIs during data collection, however, all identifiable information was deleted from  
134 all datasets prior to data being available for analysis.

135

### 136 *Measures*

137 Our outcome measures explored the specific side effects, number of side effects, and types of side effects  
138 on which women were counseled. We identified the specific side effects using the question, “*According to*  
139 *the provider, what are the possible side effects or problems related to use of [current method]*”, where  
140 “current method” indicates the current method used by the woman. Answer options included known side  
141 effects, such as changes to menstrual bleeding, in addition to side effects that are reported by women, but  
142 which are not clinically validated, such as impacts on fertility <sup>24–26</sup>. Answers were coded based on  
143 spontaneous response and were not read aloud. After first exploring the list of all side effects, we evaluate  
144 the number of side effects on which women reported being counseled. Finally, we construct a four-category  
145 variable exploring whether women were counseled on contraceptive-induced bleeding changes only, non-  
146 bleeding changes, both, or neither. Table 1 indicates how side effects were grouped.

147 For regression analyses, described further below, we included socio-demographic characteristics

148 identified from previous literature related to receiving more comprehensive counseling <sup>19–21</sup>, specifically

149 age (categorical in five year age groups), parity (categorized as 0, 1-2, 3+ births), highest level of

150 schooling attended (none, primary, secondary and above), residence (urban versus rural), and wealth  
151 quintile. Recent evidence has also highlighted critical differences in the MII across regions and by method  
152 source in Ethiopia <sup>21</sup> and we thus include region (Oromiya, Amhara, Addis, Southern Nations,  
153 Nationalities, and Peoples Region (SNNP-R)<sup>1</sup>, Tigray<sup>2</sup>, and all other regions ) and method source  
154 (hospital or health center, health post or HEW, private facilities and pharmacies).

155

156 *Analyses*

157 *Analytic Sample and Analysis*

158 Our analytic sample was restricted to women who slept in the household the night before,  
159 completed the female questionnaire, and were current users of a hormonal modern method of  
160 contraception (implant, injectable, pill, or emergency contraception) or the copper IUD (n=2,039).  
161 Descriptive statistics of frequencies and percentages were used to explore patterns of specific side effects  
162 and number of side effects on which women were counseled, among all hormonal contraception and  
163 copper IUD users and stratified by the three most-commonly used methods (implant, injectable, pill).  
164 Sample size limitations prevented stratification by EC or the copper IUD. We then used unadjusted and  
165 adjusted multinomial logistic regression models to explore the relationship between receipt of type of side  
166 effect counseling and women's sociodemographic characteristics, using women who received no side  
167 effect counseling as the reference. Due to high correlation between age and parity ( $\rho=0.70$ ), and wealth  
168 and residence ( $\rho=0.73$ ), we do not include age or wealth in the adjusted regression model. Additionally, as  
169 marriage is almost universal in the sample (Appendix Table 1), we did not adjust for marital status. Due  
170 to sample size limitations, we combine pill, EC, and copper IUD users into one "other" method type.  
171 Analyses accounted for complex survey design through application of weights and adjustment for  
172 clustering and were conducted using Stata SE 16.1 <sup>41</sup>.

---

<sup>1</sup> In 2020, a new region, Sidama, was formed from within SNNP-R. Data were collected prior to the creation of this region.

<sup>2</sup> In 2020, civil conflict began in Tigray leading to a protracted humanitarian emergency. Data were collected prior to the onset of this conflict and are not likely to represent the current situation.

173

## 174 **Results**

175 Sociodemographic characteristics of users are shown in Appendix Table 1.

176

177 Table 1 below shows the number of side effects on which women were counseled, across all users and by  
178 method. Across all users, almost three in four women report not receiving counseling on any side effects.  
179 Among women who do receive counseling, most received counseling on only one side effect. A higher  
180 percentage of implant users reported receiving any counseling on side effects (35.2%) and on more than  
181 one side effect (20.2%) than injectable (23.9% and 14.5%, respectively) or pill users (17.2% and 8.5%,  
182 respectively). Pill users received the least amount of side effect counseling, relative to implant and  
183 injectable users.

184

|    | <b>All users</b> | <b>Implant Users</b> | <b>Injectable Users</b> | <b>Pill Users</b> |
|----|------------------|----------------------|-------------------------|-------------------|
|    | %                | %                    | %                       | %                 |
| 0  | 73.0             | 64.8                 | 76.1                    | 82.8              |
| 1  | 10.5             | 12.9                 | 9.5                     | 8.7               |
| 2  | 7.0              | 8.0                  | 6.6                     | 6.5               |
| 3  | 4.8              | 8.0                  | 3.5                     | 1.0               |
| 4+ | 4.8              | 6.2                  | 4.4                     | 1.0               |

185

186 Table 2 shows the percentage of users who reported being told about each of the side effects, shown  
187 among all current hormonal users and by implant, injectable, and pill users. The most common side  
188 effects on which women were counseled were related to menstrual bleeding changes. Fewer than ten  
189 percent of women reported receiving counseling about any other potential side effects.



| Table 2: Percentage of current hormonal contraception or copper IUD users who received counseling on each side-effect |                   |               |                  |            |
|-----------------------------------------------------------------------------------------------------------------------|-------------------|---------------|------------------|------------|
|                                                                                                                       | All current users | Implant users | Injectable users | Pill users |
|                                                                                                                       | %                 | %             | %                | %          |
| <b>N</b>                                                                                                              | <b>2039</b>       | <b>675</b>    | <b>1,114</b>     | <b>158</b> |
| <b>Bleeding changes</b>                                                                                               |                   |               |                  |            |
| Less or No Bleeding                                                                                                   | 12.7              | 15.7          | 12.5             | 1.7        |
| More Bleeding                                                                                                         | 10.7              | 15.3          | 8.8              | 4.2        |
| Irregular Bleeding                                                                                                    | 8.8               | 12.8          | 7.2              | 2.4        |
| Spotting                                                                                                              | 3.7               | 5.6           | 2.7              | 0.9        |
| General Bleeding (non-specific)                                                                                       | 2.6               | 3.5           | 2.3              | 0.9        |
| <b>Non-bleeding changes</b>                                                                                           |                   |               |                  |            |
| Abdominal Pain                                                                                                        | 0.9               | 0.8           | 1.0              | 0.6        |
| Gain Weight                                                                                                           | 3.7               | 4.6           | 3.5              | 1.7        |
| Lose Weight                                                                                                           | 3.7               | 4.4           | 3.7              | 2.3        |
| Acne                                                                                                                  | 1.4               | 1.0           | 1.6              | 1.8        |
| Headache                                                                                                              | 5.8               | 9.6           | 3.8              | 4.3        |
| Infection                                                                                                             | 0.4               | 0.7           | 0.3              | 0.6        |
| Nausea                                                                                                                | 1.0               | 1.5           | 0.6              | 1.6        |
| Menstrual Cramp                                                                                                       | 1.0               | 0.1           | 1.4              | 2.4        |
| Lower sex drive                                                                                                       | 0.3               | 0.3           | 0.3              | 0.0        |
| Vaginal dryness                                                                                                       | 0.2               | 0.1           | 0.2              | 0.0        |
| Infertility/Sterility                                                                                                 | 1.0               | 0.1           | 1.5              | 0.8        |
| Delayed Fertility                                                                                                     | 1.1               | 0.2           | 1.7              | 1.3        |

|             |     |     |     |     |
|-------------|-----|-----|-----|-----|
| Method Lost | 0.3 | 0.7 | 0.1 | 0.0 |
| Weakness    | 2.1 | 3.4 | 1.4 | 0.0 |

191

192

193 Table 3 below shows the distribution of types of side effects on which women were counseled. About

194 20% of all users were counseled on at least one contraceptive-induced menstrual bleeding side effect and

195 about 15% were counseled on a non-bleeding side effect. A higher percentage of implant users (12.9%)

196 reported being told about at least one bleeding and one non-bleeding side effect, but less than five percent

197 of either injectable or pill users reported receiving counseling on both types of side effects.

198

| Table 3: Percentage of women who were told about different kinds of side effects, by method type |                  |                      |                         |                   |
|--------------------------------------------------------------------------------------------------|------------------|----------------------|-------------------------|-------------------|
|                                                                                                  | <b>All users</b> | <b>Implant Users</b> | <b>Injectable Users</b> | <b>Pill Users</b> |
|                                                                                                  | %                | %                    | %                       | %                 |
| No side effect                                                                                   | 73.0             | 64.8                 | 76.1                    | 82.8              |
| Bleeding only                                                                                    | 11.7             | 16.2                 | 10.1                    | 3.5               |
| Non-bleeding only                                                                                | 6.0              | 6.9                  | 5.2                     | 10.1              |
| Both                                                                                             | 9.4              | 12.9                 | 3.6                     | 3.6               |

199

200

201

202 Unadjusted results assessing the relationship between method choice, selected sociodemographic and

203 environmental factors, and receipt of type of side effect counseling are shown in Table 4 below. Injectable

204 and “other” method users (pill, EC, and copper IUD) were significantly less likely to be told only about a

205 bleeding change (RRR: 0.53 , 95% CI: 0.37-0.75 and RRR: 0.27, 95% CI: 0.14-0.52, respectively) and

206 significantly less likely to be told about both a bleeding change and a non-bleeding side effect (RRR: 0.62  
207 , 95% CI: 0.40-0.94 and RRR: 0.33, 95% CI: 0.16-0.68, respectively). Parous women were significantly  
208 more likely to receive counseling on at least one bleeding and non-bleeding side effect than nulliparous  
209 women. Women who received their method from a private source were significantly less likely to receive  
210 counseling on bleeding changes only or on both bleeding changes and non-bleeding side effects (RRR:  
211 0.42 , 95% CI: 0.26-0.69 and RRR: 0.23, 95% CI: 0.12-0.44, respectively) while women who received  
212 services from a health post or HEW were significantly less likely to receive counseling on at least one of  
213 each type of side effect than women who received services from a hospital or health center (RRR: 0.59 ,  
214 95% CI: 0.36-0.98). Region, wealth, and education appeared to be largely unrelated to the type of side  
215 effect on which women were counseled, with some exceptions.  
216

| Table 4: Unadjusted multinomial logistic regression results. PMA Ethiopia 2019 cross-sectional survey |            |            |        |      |                |        |      |      |        |      |
|-------------------------------------------------------------------------------------------------------|------------|------------|--------|------|----------------|--------|------|------|--------|------|
|                                                                                                       |            | CIMBC only |        |      | non-CIMBC only |        |      | Both |        |      |
|                                                                                                       |            | RRR        | 95% CI |      | RRR            | 95% CI |      | RRR  | 95% CI |      |
| <b>Method (ref: implant)</b>                                                                          |            |            |        |      |                |        |      |      |        |      |
|                                                                                                       | Injectable | 0.53       | 0.37   | 0.75 | 0.63           | 0.38   | 1.06 | 0.62 | 0.40   | 0.94 |
|                                                                                                       | Other      | 0.27       | 0.14   | 0.52 | 0.82           | 0.45   | 1.50 | 0.33 | 0.16   | 0.68 |
| <b>Age (ref: 15-19)</b>                                                                               |            |            |        |      |                |        |      |      |        |      |
|                                                                                                       | 20-24      | 0.75       | 0.35   | 1.64 | 0.80           | 0.33   | 1.93 | 1.79 | 0.68   | 4.72 |
|                                                                                                       | 25-29      | 1.12       | 0.58   | 2.16 | 1.35           | 0.59   | 3.08 | 2.86 | 1.11   | 7.38 |
|                                                                                                       | 30-34      | 1.17       | 0.57   | 2.43 | 0.66           | 0.26   | 1.67 | 2.19 | 0.85   | 5.64 |
|                                                                                                       | 35-39      | 1.04       | 0.57   | 1.90 | 0.93           | 0.36   | 2.39 | 1.68 | 0.64   | 4.41 |
|                                                                                                       | 40-44      | 0.78       | 0.32   | 1.93 | 1.02           | 0.38   | 2.70 | 2.51 | 0.82   | 7.66 |
|                                                                                                       | 45-49      | 0.81       | 0.27   | 2.47 | 0.57           | 0.08   | 3.97 | 2.08 | 0.48   | 9.01 |
| <b>Parity (ref: 0)</b>                                                                                |            |            |        |      |                |        |      |      |        |      |
|                                                                                                       | 1-2        | 1.84       | 0.92   | 3.67 | 1.10           | 0.54   | 2.23 | 3.05 | 1.49   | 6.23 |
|                                                                                                       | 3+         | 1.69       | 0.84   | 3.42 | 1.11           | 0.53   | 2.33 | 2.47 | 1.16   | 5.24 |
| <b>Education (ref: None)</b>                                                                          |            |            |        |      |                |        |      |      |        |      |
|                                                                                                       | Primary    | 1.13       | 0.78   | 1.64 | 1.19           | 0.72   | 1.98 | 1.05 | 0.69   | 1.58 |
|                                                                                                       | Secondary  | 1.38       | 0.93   | 2.05 | 1.63           | 0.90   | 2.95 | 1.73 | 1.06   | 2.83 |
| <b>Residence (ref: rural)</b>                                                                         |            |            |        |      |                |        |      |      |        |      |
|                                                                                                       | Urban      | 1.09       | 0.74   | 1.61 | 1.53           | 0.92   | 2.56 | 1.03 | 0.67   | 1.59 |
| <b>Region (ref: Oromiya)</b>                                                                          |            |            |        |      |                |        |      |      |        |      |
|                                                                                                       | Tigray     | 0.38       | 0.23   | 0.64 | 0.94           | 0.47   | 1.89 | 0.81 | 0.47   | 1.39 |
|                                                                                                       | Amhara     | 0.95       | 0.56   | 1.62 | 1.72           | 0.83   | 3.56 | 1.15 | 0.65   | 2.03 |

|                                                       |                 |      |      |      |      |      |      |      |      |      |
|-------------------------------------------------------|-----------------|------|------|------|------|------|------|------|------|------|
|                                                       | Addis           | 0.62 | 0.33 | 1.16 | 0.76 | 0.35 | 1.68 | 1.14 | 0.60 | 2.16 |
|                                                       | SNNP            | 0.74 | 0.37 | 1.48 | 1.11 | 0.55 | 2.24 | 0.78 | 0.34 | 1.77 |
|                                                       | Other           | 0.83 | 0.51 | 1.36 | 2.39 | 1.22 | 4.68 | 1.63 | 0.76 | 3.50 |
| <b>Wealth (ref: Lowest)</b>                           |                 |      |      |      |      |      |      |      |      |      |
|                                                       | Lower           | 0.79 | 0.40 | 1.55 | 0.38 | 0.15 | 0.98 | 0.87 | 0.42 | 1.80 |
|                                                       | Middle          | 1.29 | 0.60 | 2.78 | 0.53 | 0.20 | 1.40 | 1.22 | 0.63 | 2.37 |
|                                                       | Higher          | 1.27 | 0.67 | 2.40 | 0.94 | 0.42 | 2.12 | 0.92 | 0.40 | 2.10 |
|                                                       | Highest         | 1.35 | 0.74 | 2.44 | 1.03 | 0.47 | 2.24 | 1.27 | 0.62 | 2.61 |
| <b>Source of method (ref: Hospital/Health Center)</b> |                 |      |      |      |      |      |      |      |      |      |
|                                                       | Health Post/HEW | 0.76 | 0.49 | 1.17 | 0.73 | 0.39 | 1.37 | 0.59 | 0.36 | 0.98 |
|                                                       | Non-public      | 0.42 | 0.26 | 0.69 | 0.56 | 0.30 | 1.02 | 0.23 | 0.12 | 0.44 |

218

219 Adjusted results are shown in Table 5. Results were largely consistent after adjustment. Injectable and  
220 other method users were significantly less likely than implant users to be told only about only a bleeding  
221 side effect and other method users were significantly less likely to be told about both a bleeding and non-  
222 bleeding side effect. Women of higher parity remained significantly more likely to be told about both a  
223 bleeding and non-bleeding side effect. Women with secondary education and higher were more likely to  
224 receive counseling on bleeding changes only or on both bleeding-and non-bleeding changes.

225

|                                                       |                 | CIMBC only |        |      | non-CIMBC only |        |      | Both |        |      |
|-------------------------------------------------------|-----------------|------------|--------|------|----------------|--------|------|------|--------|------|
|                                                       |                 | RRR        | 95% CI |      | RRR            | 95% CI |      | RRR  | 95% CI |      |
| <b>Method (ref: implant)</b>                          |                 |            |        |      |                |        |      |      |        |      |
|                                                       | Injectable      | 0.65       | 0.46   | 0.93 | 0.74           | 0.42   | 1.28 | 0.76 | 0.50   | 1.15 |
|                                                       | Other           | 0.31       | 0.16   | 0.61 | 0.81           | 0.42   | 1.57 | 0.43 | 0.19   | 0.93 |
| <b>Parity (ref: 0)</b>                                |                 |            |        |      |                |        |      |      |        |      |
|                                                       | 1-2             | 1.53       | 0.74   | 3.17 | 1.03           | 0.51   | 2.09 | 2.48 | 1.17   | 5.29 |
|                                                       | 3+              | 1.70       | 0.79   | 3.65 | 1.36           | 0.64   | 2.88 | 2.53 | 1.15   | 5.59 |
| <b>Education (ref: None)</b>                          |                 |            |        |      |                |        |      |      |        |      |
|                                                       | Primary         | 1.17       | 0.77   | 1.78 | 1.32           | 0.75   | 2.31 | 1.18 | 0.78   | 1.78 |
|                                                       | Secondary       | 1.62       | 1.01   | 2.62 | 1.72           | 0.90   | 3.32 | 2.47 | 1.44   | 4.21 |
| <b>Residence (ref: rural)</b>                         |                 |            |        |      |                |        |      |      |        |      |
|                                                       | Urban           | 0.88       | 0.54   | 1.42 | 0.69           | 0.37   | 1.32 | 1.11 | 0.61   | 2.02 |
| <b>Region (ref: Oromiya)</b>                          |                 |            |        |      |                |        |      |      |        |      |
|                                                       | Tigray          | 0.40       | 0.24   | 0.69 | 1.00           | 0.49   | 2.03 | 0.87 | 0.50   | 1.52 |
|                                                       | Amhara          | 1.03       | 0.54   | 1.99 | 1.44           | 0.63   | 3.28 | 1.34 | 0.64   | 2.82 |
|                                                       | Addis           | 0.60       | 0.32   | 1.12 | 0.75           | 0.34   | 1.66 | 1.10 | 0.57   | 2.11 |
|                                                       | SNNP            | 0.67       | 0.33   | 1.33 | 1.00           | 0.49   | 2.06 | 0.68 | 0.29   | 1.57 |
|                                                       | Other           | 0.86       | 0.53   | 1.37 | 2.19           | 1.12   | 4.28 | 1.78 | 0.77   | 4.10 |
| <b>Source of method (ref: Hospital/Health Center)</b> |                 |            |        |      |                |        |      |      |        |      |
|                                                       | Health Post/HEW | 0.92       | 0.60   | 1.40 | 0.94           | 0.49   | 1.81 | 0.68 | 0.40   | 1.13 |

|  |            |      |      |      |      |      |      |      |      |      |
|--|------------|------|------|------|------|------|------|------|------|------|
|  | Non-public | 0.49 | 0.30 | 0.82 | 0.49 | 0.27 | 0.90 | 0.27 | 0.13 | 0.55 |
|--|------------|------|------|------|------|------|------|------|------|------|

226

227

## 228 **Discussion**

229 We find that most contraceptive users in Ethiopia do not receive sufficient counseling, as approximately  
230 three in four users reported they were either not counseled on any side effects or received counseling on  
231 only one side effect. Women were most likely to receive counseling on contraceptive-induced menstrual  
232 bleeding changes, if they received any counseling at all, and few women received counseling on any non-  
233 bleeding changes. Our findings highlight the ongoing need for improvements in access to high-quality,  
234 comprehensive contraceptive services.

235

236 Despite current and recent contraceptive users in Ethiopia experiencing a wide range of side effects <sup>24</sup>,  
237 fewer than 20% of women reported being counseled on at least two side effects, and the majority of  
238 women who received counseling only received counseling on contraceptive-induced menstrual bleeding  
239 changes. While concerns about bleeding changes do feature heavily in women's worries related to  
240 contraceptive side effects <sup>23</sup>, given the range of potential side effects associated with hormonal  
241 contraception and the non-hormonal IUD, this limited counseling does not represent sufficient  
242 information exchange between providers and clients. Evidence suggests that women learn about side  
243 effects, both clinically validated and not, from a range of sources <sup>6,31,42</sup>, but largely trust providers to  
244 deliver scientifically sound and accurate information <sup>13,43</sup>. If women are already aware of and concerned  
245 about potential side effects, receiving counseling from providers on the full range of potential side effects  
246 is an important opportunity to address concerns and dispel myths. Incorporation of structured tools such  
247 as the NORMAL <sup>44</sup> tool or the Balanced Counseling Strategy <sup>45</sup> could help address some of these  
248 counseling gaps and help women make informed decisions about contraception. The Federal Ministry of  
249 Health of Ethiopia recently introduced a strategy to improve counseling through the use of structured



250 counseling tools in public health facilities, but implementation was at the onset at the time of this  
251 publication.  
252  
253 Concerns related to contraceptive-induced fertility impairment may be particularly relevant to address, as  
254 these concerns, at least qualitatively, remain a major reason for contraceptive non-use<sup>26,27</sup>. Approximately  
255 1% of users reported that they were counseled about infertility or delayed return to fertility. A significant  
256 weakness in our study is that we cannot distinguish whether providers were reinforcing or dispelling these  
257 concerns, however, our finding that so few women reported being counseled on this topic reinforces that  
258 women are unlikely to have this concern addressed by a provider. Additionally, we found that women  
259 who were more educated and those who had a greater number of children were more likely to receive  
260 counseling on at least one potential bleeding change and one non-bleeding change related to their  
261 contraceptive method. While our study is unable to explain what specific behaviors would influence why  
262 nulliparous women would receive less comprehensive counseling, fears related to contraception may be  
263 particularly relevant to address among younger and nulliparous women as they tend to have the lowest  
264 rates of contraceptive use among women who wish to prevent pregnancy<sup>46,47</sup>. Provider bias towards  
265 specific methods based on patient characteristics, such as marital status and parity, may influence  
266 counseling, as has been documented elsewhere<sup>13,14,34,48</sup>. Additional research among providers is necessary  
267 to understand how user characteristics influence providers' counseling practices on side effects.  
268  
269 Finally, receipt of more comprehensive counseling was influenced by method choice and source of  
270 method. On the whole, implant users were the most likely to receive counseling on side effects and pill  
271 users were the least likely. While side effect profiles differ by method and thus, counseling should also  
272 differ, all hormonal methods have the potential for both bleeding and non-bleeding changes. As the  
273 implant requires clinical intervention to stop use, it is potentially positive that implant users received  
274 relatively more counseling on side effects, however, all women, regardless of the method they select,  
275 should be comprehensively counseled in order to make an informed choice. As with directive counseling

276 based on patient characteristics, differences in counseling by method may be explained by provider  
277 concerns about safety or preferences for specific methods <sup>34</sup>. This finding further reinforces the need for  
278 research with providers to understand how knowledge of and concerns about side effects influence  
279 counseling.  
280  
281 These method-specific differences in counseling experiences may in part be explained by method source.  
282 For example, pill users may be more likely to source their method from a range of sources and less likely  
283 to rely on trained providers. This relationship between method type and counseling remained, however,  
284 even after adjusting for method source. Women who received their methods outside of the public health  
285 sector had significantly lower relative risk of receiving counseling on any side effects. The majority of  
286 women in Ethiopia access their methods through the public health sector <sup>36</sup>, but efforts are underway to  
287 expand the private sector in Ethiopia through such projects as the Ethiopia Private Health Sector Project  
288 <sup>49,50</sup>. Evidence suggests that private facilities are less likely to have trained FP providers or clear  
289 guidelines and protocols for FP provision <sup>51</sup>. Thus, expansion of the private sector must be done with  
290 quality in mind, ensuring that private providers, particularly drug shop owners and pharmacists, are  
291 trained to provide comprehensive counseling.  
292  
293 Our study is not without limitations. Our survey question about contraceptive side effects did not  
294 distinguish what information was provided about each side effect or confirm if scientifically accurate  
295 information was shared. Such nuance is likely not possible in a population-based survey and requires  
296 alternative data collection strategies, such as observation of counseling sessions. Additionally, we  
297 collected information retroactively; recall of specific information is likely to fade over time and introduce  
298 bias. If so, we may be underestimating the percentage of women who received more comprehensive  
299 counseling. Similarly, we collect information only among current users of contraception. Women who  
300 discontinued their method prior to the survey or who received counseling but chose not to adopt a method  
301 may have received different counseling than women who continued, which is not reflected in our findings

302 due to data limitations. Finally, data were collected in Tigray in 2019 prior to the onset of widespread  
303 civil conflict and are not able to be generalized to the current situation. Despite these limitations, we  
304 believe that the use a high-quality, nationally representative data source that incorporated detailed  
305 information on side effect counseling provides clear evidence of gaps in counseling that must be  
306 addressed to enhance informed decision-making and improve reproductive health outcomes.

307

### 308 **Conclusions**

309 Women in Ethiopia do not receive sufficient information on side effects during contraceptive counseling,  
310 particularly related to side effects outside of menstrual bleeding changes. Private health facilities appear  
311 to be of particular concern. Efforts to improve counseling, such as structured counseling tools, should be  
312 incorporated into the private sector. Additionally, research with providers is necessary to understand and  
313 address biases towards specific methods and counseling messages.

314

### 315 **Declarations**

### 316 **Acknowledgements**

317 We thank the PMA Ethiopia team for their dedication in conducting the PMA Ethiopia surveys and the  
318 respondents for sharing their time and experiences.

319

320

321

- 322
- 323 1. Bruce J. Fundamental Elements of the Quality of Care: A Simple Framework. *Studies in*  
324 *Family Planning*. 1990;21(2):61. doi:10.2307/1966669
- 325 2. Hardee K. Operationalizing Human Rights in Sexual and Reproductive Health and Rights  
326 Programming: An Example from a Global Family Planning Partnership. Oxford Research  
327 Encyclopedia of Global Public Health. doi:10.1093/acrefore/9780190632366.013.239
- 328 3. Hatcher RA, Trussell J, Nelson AL, Cates Jr W, Kowal D, Policar MS. *Contraceptive*  
329 *Technology*. 20th Revised. Ardent Media, Inc; 2015.
- 330 4. Sedgh G, Hussain R. Reasons for Contraceptive Nonuse among Women Having Unmet  
331 Need for Contraception in Developing Countries. *Studies in Family Planning*.  
332 2014;45(2):151-169. doi:10.1111/j.1728-4465.2014.00382.x
- 333 5. Schrupf LA, Stephens MJ, Nsarko NE, et al. Side effect concerns and their impact on  
334 women's uptake of modern family planning methods in rural Ghana: a mixed methods study.  
335 *BMC Womens Health*. 2020;20:57. doi:10.1186/s12905-020-0885-0
- 336 6. Diamond-Smith N, Campbell M, Madan S. Misinformation and fear of side-effects of family  
337 planning. *Culture, Health & Sexuality*. 2012;14(4):421-433.  
338 doi:10.1080/13691058.2012.664659
- 339 7. Ali MM, Cleland JG, Shah IH, World Health Organization. *Causes and Consequences of*  
340 *Contraceptive Discontinuation: Evidence from 60 Demographic and Health Surveys*. World  
341 Health Organization; 2012. Accessed February 7, 2022.  
342 <https://apps.who.int/iris/handle/10665/75429>

- 343 8. Bradley SEK, Schwandt HM, Khan S. *Levels, Trends, and Reasons for Contraceptive*  
344 *Discontinuation*. ICF Macro; 200AD. Accessed March 5, 2021.  
345 <https://www.dhsprogram.com/pubs/pdf/AS20/AS20.pdf>
- 346 9. Jain A, Reichenbach L, Ehsan I, Rob U. "Side effects affected my daily activities a lot": a  
347 qualitative exploration of the impact of contraceptive side effects in Bangladesh. *Open*  
348 *Access J Contracept*. 2017;8:45-52. doi:10.2147/OAJC.S140214
- 349 10. Canto De Cetina TE, Canto P, Ordoñez Luna M. Effect of counseling to improve compliance  
350 in Mexican women receiving depot-medroxyprogesterone acetate. *Contraception*.  
351 2001;63(3):143-146. doi:10.1016/S0010-7824(01)00181-0
- 352 11. Dehingia N, Dixit A, Averbach S, et al. Family planning counseling and its associations with  
353 modern contraceptive use, initiation, and continuation in rural Uttar Pradesh, India. *Reprod*  
354 *Health*. 2019;16(1):178. doi:10.1186/s12978-019-0844-0
- 355 12. Huda FA, Chowdhuri S, Sirajuddin MFR. Importance of Appropriate Counselling in  
356 Reducing Early Discontinuation of Norplant in a Northern District of Bangladesh. *J Health*  
357 *Popul Nutr*. 2014;32(1):142-148.
- 358 13. Yirgu R, Wood SN, Karp C, Tsui A, Moreau C. "You better use the safer one... leave this  
359 one": the role of health providers in women's pursuit of their preferred family planning  
360 methods. *BMC Women's Health*. 2020;20(1):170. doi:10.1186/s12905-020-01034-1
- 361 14. Senderowicz L, Pearson E, Hackett K, et al. 'I haven't heard much about other methods':  
362 quality of care and person-centredness in a programme to promote the postpartum  
363 intrauterine device in Tanzania. *BMJ Global Health*. 2021;6(6):e005775. doi:10.1136/bmjgh-  
364 2021-005775

- 365 15. Jain A, Townshend J, RamaRao S. *Proposed Metrics to Measure Quality: Overview*.  
366 Population Council; 2018. doi:10.31899/rh6.1024
- 367 16. Chakraborty NM, Chang K, Bellows B, et al. Association Between the Quality of  
368 Contraceptive Counseling and Method Continuation: Findings From a Prospective Cohort  
369 Study in Social Franchise Clinics in Pakistan and Uganda. *Glob Health Sci Pract*.  
370 2019;7(1):87-102. doi:10.9745/GHSP-D-18-00407
- 371 17. Tin KN, Maung TM, Win T. Factors that affect the discontinuation of family planning  
372 methods in Myanmar: analysis of the 2015–16 Myanmar Demographic and Health Survey.  
373 *Contracept Reprod Med*. 2020;5(1):20. doi:10.1186/s40834-020-00126-5
- 374 18. Budiharsana MP, Wahyuningsih W, Heywood P. The use of Method Information Index (MII)  
375 to monitor the amount of information given to women users of modern contraceptives in  
376 Indonesia: results from an analysis of the 2007, 2012 and 2017 demographic and health  
377 surveys. *BMC Women's Health*. 2022;22(1):489. doi:10.1186/s12905-022-02094-1
- 378 19. Bullington BW, Tumlinson K, Karp C, et al. Do users of long-acting reversible contraceptives  
379 receive the same counseling content as other modern method users? A cross-sectional,  
380 multi-country analysis of women's experiences with the Method Information Index in six sub-  
381 Saharan African countries. *Contracept X*. 2022;4:100088. doi:10.1016/j.conx.2022.100088
- 382 20. Jain. Examining Progress and Equity in Information Received by Women Using a Modern  
383 Method in 25 Developing Countries. *International Perspectives on Sexual and Reproductive*  
384 *Health*. 2016;42(3):131. doi:10.1363/42e1616
- 385 21. Ejigu BA, Seme A, Zimmerman L, Shiferaw S. Trend and determinants of quality of family  
386 planning counseling in Ethiopia: Evidence from repeated PMA cross-sectional surveys,  
387 (2014–2019). *PLOS ONE*. 2022;17(5):e0267944. doi:10.1371/journal.pone.0267944

- 388 22. Chang KT, Mukanu M, Bellows B, et al. Evaluating Quality of Contraceptive Counseling: An  
389 Analysis of the Method Information Index. *Studies in Family Planning*. 2019;50(1):25-42.  
390 doi:10.1111/sifp.12081
- 391 23. Polis CB, Hussain R, Berry A. There might be blood: a scoping review on women's  
392 responses to contraceptive-induced menstrual bleeding changes. *Reprod Health*.  
393 2018;15(1):114. doi:10.1186/s12978-018-0561-0
- 394 24. Zimmerman LA, Sarnak DO, Karp C, et al. Measuring experiences and concerns  
395 surrounding contraceptive induced side-effects in a nationally representative sample of  
396 contraceptive users: Evidence from PMA Ethiopia. *Contraception: X*. 2022;4:100074.  
397 doi:10.1016/j.conx.2022.100074
- 398 25. Zimmerman LA, Sarnak DO, Karp C, et al. Association between experience of specific side-  
399 effects and contraceptive switching and discontinuation in Uganda: results from a  
400 longitudinal study. *Reproductive Health*. 2021;18(1):239. doi:10.1186/s12978-021-01287-5
- 401 26. Sedlander E, Bingenheimer JB, Thiongo M, et al. "They Destroy the Reproductive System":  
402 Exploring the Belief that Modern Contraceptive Use Causes Infertility. *Studies in Family*  
403 *Planning*. 2018;49(4):345-365. doi:<https://doi.org/10.1111/sifp.12076>
- 404 27. Sedlander E, Bingenheimer JB, Lahiri S, et al. Does the Belief That Contraceptive Use  
405 Causes Infertility Actually Affect Use? Findings from a Social Network Study in Kenya.  
406 *Studies in Family Planning*. 2021;52(3):343-359. doi:10.1111/sifp.12157
- 407 28. Sedlander E, Yilma H, Emaway D, Rimal RN. If fear of infertility restricts contraception use,  
408 what do we know about this fear? An examination in rural Ethiopia. *Reproductive Health*.  
409 2022;19(1):57. doi:10.1186/s12978-021-01267-9



- 410 29. Boivin J, Carrier J, Zulu JM, Edwards D. A rapid scoping review of fear of infertility in Africa.  
411 *Reproductive Health*. 2020;17(1):142. doi:10.1186/s12978-020-00973-0
- 412 30. Adofo E, Dun-Dery EJ, Kotoh AM, Dun-Dery F, Avoka JA, Ashinyo ME. Fear of infertility  
413 limits contraceptive usage among first-time mothers in Ghana: A cross-sectional study.  
414 *SAGE Open Medicine*. 2021;9:20503121211021256. doi:10.1177/20503121211021256
- 415 31. Schwarz J, Dumbaugh M, Bapolisi W, et al. “So that’s why I’m scared of these methods”:  
416 Locating contraceptive side effects in embodied life circumstances in Burundi and eastern  
417 Democratic Republic of the Congo. *Soc Sci Med*. 2019;220:264-272.  
418 doi:10.1016/j.socscimed.2018.09.030
- 419 32. Nalwadda G, Mirembe F, Tumwesigye NM, Byamugisha J, Faxelid E. Constraints and  
420 prospects for contraceptive service provision to young people in Uganda: providers’  
421 perspectives. *BMC Health Serv Res*. 2011;11(1):220. doi:10.1186/1472-6963-11-220
- 422 33. Paul M, Näsström SB, Klingberg-Allvin M, Kiggundu C, Larsson EC. Healthcare providers  
423 balancing norms and practice: challenges and opportunities in providing contraceptive  
424 counselling to young people in Uganda – a qualitative study. *Global Health Action*.  
425 2016;9(1):30283. doi:10.3402/gha.v9.30283
- 426 34. Solo J, Festin M. Provider Bias in Family Planning Services: A Review of Its Meaning and  
427 Manifestations. *Glob Health Sci Pract*. 2019;7(3):371-385. doi:10.9745/GHSP-D-19-00130
- 428 35. Central Statistical Agency (CSA), ORC Macro. *Ethiopia Demographic and Health Survey*  
429 *2000*. Central Stastical Authority and ORC Macro; 2001. Accessed February 10, 2021.  
430 <https://dhsprogram.com/pubs/pdf/FR328/FR328.pdf>

- 431 36. PMA Ethiopia. *PMA Ethiopia: Results from the 2019 Surveys*. Addis Ababa University,  
432 School of Public Health and Johns Hopkins Bloomberg School of Public Health; 2020.  
433 Accessed January 13, 2023.  
434 [https://www.pmadata.org/sites/default/files/data\\_product\\_results/Ethiopia\\_2019\\_Survey\\_Results\\_Brief.pdf](https://www.pmadata.org/sites/default/files/data_product_results/Ethiopia_2019_Survey_Results_Brief.pdf)  
435
- 436 37. Tsui AO, Brown W, Li Q. Contraceptive Practice in Sub-Saharan Africa. *Popul Dev Rev*.  
437 2017;43(Suppl Suppl 1):166-191. doi:10.1111/padr.12051
- 438 38. Alvergne A, Stevens R, Gurm E. Side effects and the need for secrecy: characterising  
439 discontinuation of modern contraception and its causes in Ethiopia using mixed methods.  
440 *Contracept Reprod Med*. 2017;2(1):24. doi:10.1186/s40834-017-0052-7
- 441 39. Abebe M, Mersha A, Degefa N, Gebremeskel F, Kefelew E, Molla W. Determinants of  
442 induced abortion among women received maternal health care services in public hospitals  
443 of Arba Minch and Wolayita Sodo town, southern Ethiopia: unmatched case–control study.  
444 *BMC Women’s Health*. 2022;22(1):107. doi:10.1186/s12905-022-01695-0
- 445 40. Zimmerman L, Desta S, Yihdego M, et al. Protocol for PMA-Ethiopia: A new data source for  
446 cross-sectional and longitudinal data of reproductive, maternal, and newborn health. *Gates*  
447 *Open Res*. 2020;4. doi:10.12688/gatesopenres.13161.1
- 448 41. StataCorp. Stata Statistical Software: Release 16. Published online 2019.
- 449 42. Chebet JJ, McMahon SA, Greenspan JA, et al. “Every method seems to have its problems”-  
450 Perspectives on side effects of hormonal contraceptives in Morogoro Region, Tanzania.  
451 *BMC Women’s Health*. 2015;15(1):97. doi:10.1186/s12905-015-0255-5

- 452 43. Keesara SR, Juma PA, Harper CC. Why do women choose private over public facilities for  
453 family planning services? A qualitative study of post-partum women in an informal urban  
454 settlement in Kenya. *BMC Health Serv Res.* 2015;15(1):335. doi:10.1186/s12913-015-0997-  
455 7
- 456 44. Rademacher KH, Sergison J, Glish L, et al. Menstrual Bleeding Changes Are NORMAL:  
457 Proposed Counseling Tool to Address Common Reasons for Non-Use and Discontinuation  
458 of Contraception. *Glob Health Sci Pract.* 2018;6(3):603-610. doi:10.9745/GHSP-D-18-00093
- 459 45. Population Council. *The Balanced Counseling Strategy Plus: A Toolkit for Family Planning*  
460 *Service Providers Working in High HIV/STI Prevalence Settings.* Population Council; 2015.
- 461 46. de Vargas Nunes Coll C, Ewerling F, Hellwig F, de Barros AJD. Contraception in  
462 adolescence: the influence of parity and marital status on contraceptive use in 73 low-and  
463 middle-income countries. *Reproductive Health.* 2019;16(1):21. doi:10.1186/s12978-019-  
464 0686-9
- 465 47. Behrman JA, Wright KQ, Grant MJ, Soler-Hampejsek E. Trends in Modern Contraceptive  
466 Use among Young Adult Women in sub-Saharan Africa 1990 to 2014. *Studies in Family*  
467 *Planning.* 2018;49(4):319-344. doi:10.1111/sifp.12075
- 468 48. Daniele MAS, Cleland J, Benova L, Ali M. Provider and lay perspectives on intra-uterine  
469 contraception: a global review. *Reproductive Health.* 2017;14(1):119. doi:10.1186/s12978-  
470 017-0380-8
- 471 49. Ministry of Health - Ethiopia, Global Financing Facility, World Bank Group. *Ethiopia Health*  
472 *Private Sector Assessment.*; 2019. Accessed October 25, 2022.  
473 [https://www.globalfinancingfacility.org/sites/gff\\_new/files/documents/Ethiopia-health-private-](https://www.globalfinancingfacility.org/sites/gff_new/files/documents/Ethiopia-health-private-sector-assessment.pdf)  
474 [sector-assessment.pdf](https://www.globalfinancingfacility.org/sites/gff_new/files/documents/Ethiopia-health-private-sector-assessment.pdf)

- 475 50. The Ethiopia Private Health Sector Project | Abt Associates. Accessed March 21, 2023.  
476 <https://www.abtassociates.com/projects/the-ethiopia-private-health-sector-project>
- 477 51. Tessema GA, Mahmood MA, Gomersall JS, et al. Structural Quality of Services and Use of  
478 Family Planning Services in Primary Health Care Facilities in Ethiopia. How Do Public and  
479 Private Facilities Compare? *International Journal of Environmental Research and Public*  
480 *Health*. 2020;17(12):4201. doi:10.3390/ijerph17124201
- 481  
482

| Appendix Table 1: Sample characteristics of users of hormonal contraception and the IUD; PMA Ethiopia Cross-section 2019 |                        |                   |                 |
|--------------------------------------------------------------------------------------------------------------------------|------------------------|-------------------|-----------------|
|                                                                                                                          |                        | Total             |                 |
|                                                                                                                          |                        | n<br>(unweighted) | %<br>(weighted) |
| Method                                                                                                                   |                        |                   |                 |
|                                                                                                                          | Implant                | 675               | 33.2            |
|                                                                                                                          | Injectable             | 1114              | 57.4            |
|                                                                                                                          | Pill                   | 158               | 6.5             |
|                                                                                                                          | Other                  | 73                | 2.9             |
| Source of Method                                                                                                         |                        |                   |                 |
|                                                                                                                          | Hospital/health center | 1103              | 53.4            |
|                                                                                                                          | Health post/HEW        | 464               | 27.0            |
|                                                                                                                          | Non-public             | 472               | 19.6            |
| Age                                                                                                                      |                        |                   |                 |
|                                                                                                                          | 15-19                  | 160               | 9.0             |
|                                                                                                                          | 20-24                  | 439               | 21.4            |
|                                                                                                                          | 25-29                  | 578               | 27.4            |
|                                                                                                                          | 30-34                  | 372               | 16.8            |
|                                                                                                                          | 35-39                  | 288               | 14.3            |
|                                                                                                                          | 40-44                  | 160               | 9.1             |
|                                                                                                                          | 45-49                  | 42                | 2.2             |
| Marital Status                                                                                                           |                        |                   |                 |

|           |             |      |      |
|-----------|-------------|------|------|
|           | Married     | 202  | 8.4  |
|           | Unmarried   | 1837 | 91.6 |
| Parity    |             |      |      |
|           | 0           | 238  | 10.8 |
|           | 1-2         | 945  | 44.2 |
|           | 3+          | 855  | 45.0 |
| Education |             |      |      |
|           | None        | 648  | 36.4 |
|           | Primary     | 790  | 39.6 |
|           | Secondary + | 601  | 23.9 |
| Residence |             |      |      |
|           | Rural       | 1100 | 64.1 |
|           | Urban       | 939  | 35.9 |
| Region    |             |      |      |
|           | Oromiya     | 449  | 38.8 |
|           | Amhara      | 451  | 27.7 |
|           | Addis       | 206  | 6.4  |
|           | SNNP        | 407  | 19.4 |
|           | Tigray      | 243  | 5.2  |
|           | Other       | 283  | 2.5  |
| Wealth    |             |      |      |
|           | Lowest      | 241  | 15.0 |
|           | Lower       | 305  | 18.3 |
|           | Middle      | 360  | 21.3 |
|           | Higher      | 421  | 19.9 |

483

|  |         |     |      |
|--|---------|-----|------|
|  | Highest | 712 | 25.5 |
|--|---------|-----|------|
